# Supplementary material
Source: PubMed Central journal article supplement (PMC1440517)
Supplement: NIHMS4378-supplement-SI.pdf [file NIHMS4378-supplement-SI.pdf]

36 40 50 60  
FFSCQRYKGVWRGDGIMQTTCP CGAQITGH  
B1 B2

70 80 90  
VKNGSMRIVGPR TCSNTWHGTFP INAYTTGPC  
B2 B3 H2

100 110 120 130  
TPSPAPNYSRALWRVAEEYVEVTRVGDFHYV  
B4 B5 B6

140 150 160  
TGMTTDNVKCPQVPAPEFFTEVDGVR LHR YA  
B6 B7

170 180 190  
PACKP LLREEVTFLV GLNQYLVGSQ L PCEPEPD  
B8 B9

198  
VAV
